# Supplementary material
Source: publisher figshare collection journal article supplement (https://geolsoc.figshare.com/ndownloader/files/24737227)
Supplement: Supplementary file 1 [file 24737227]

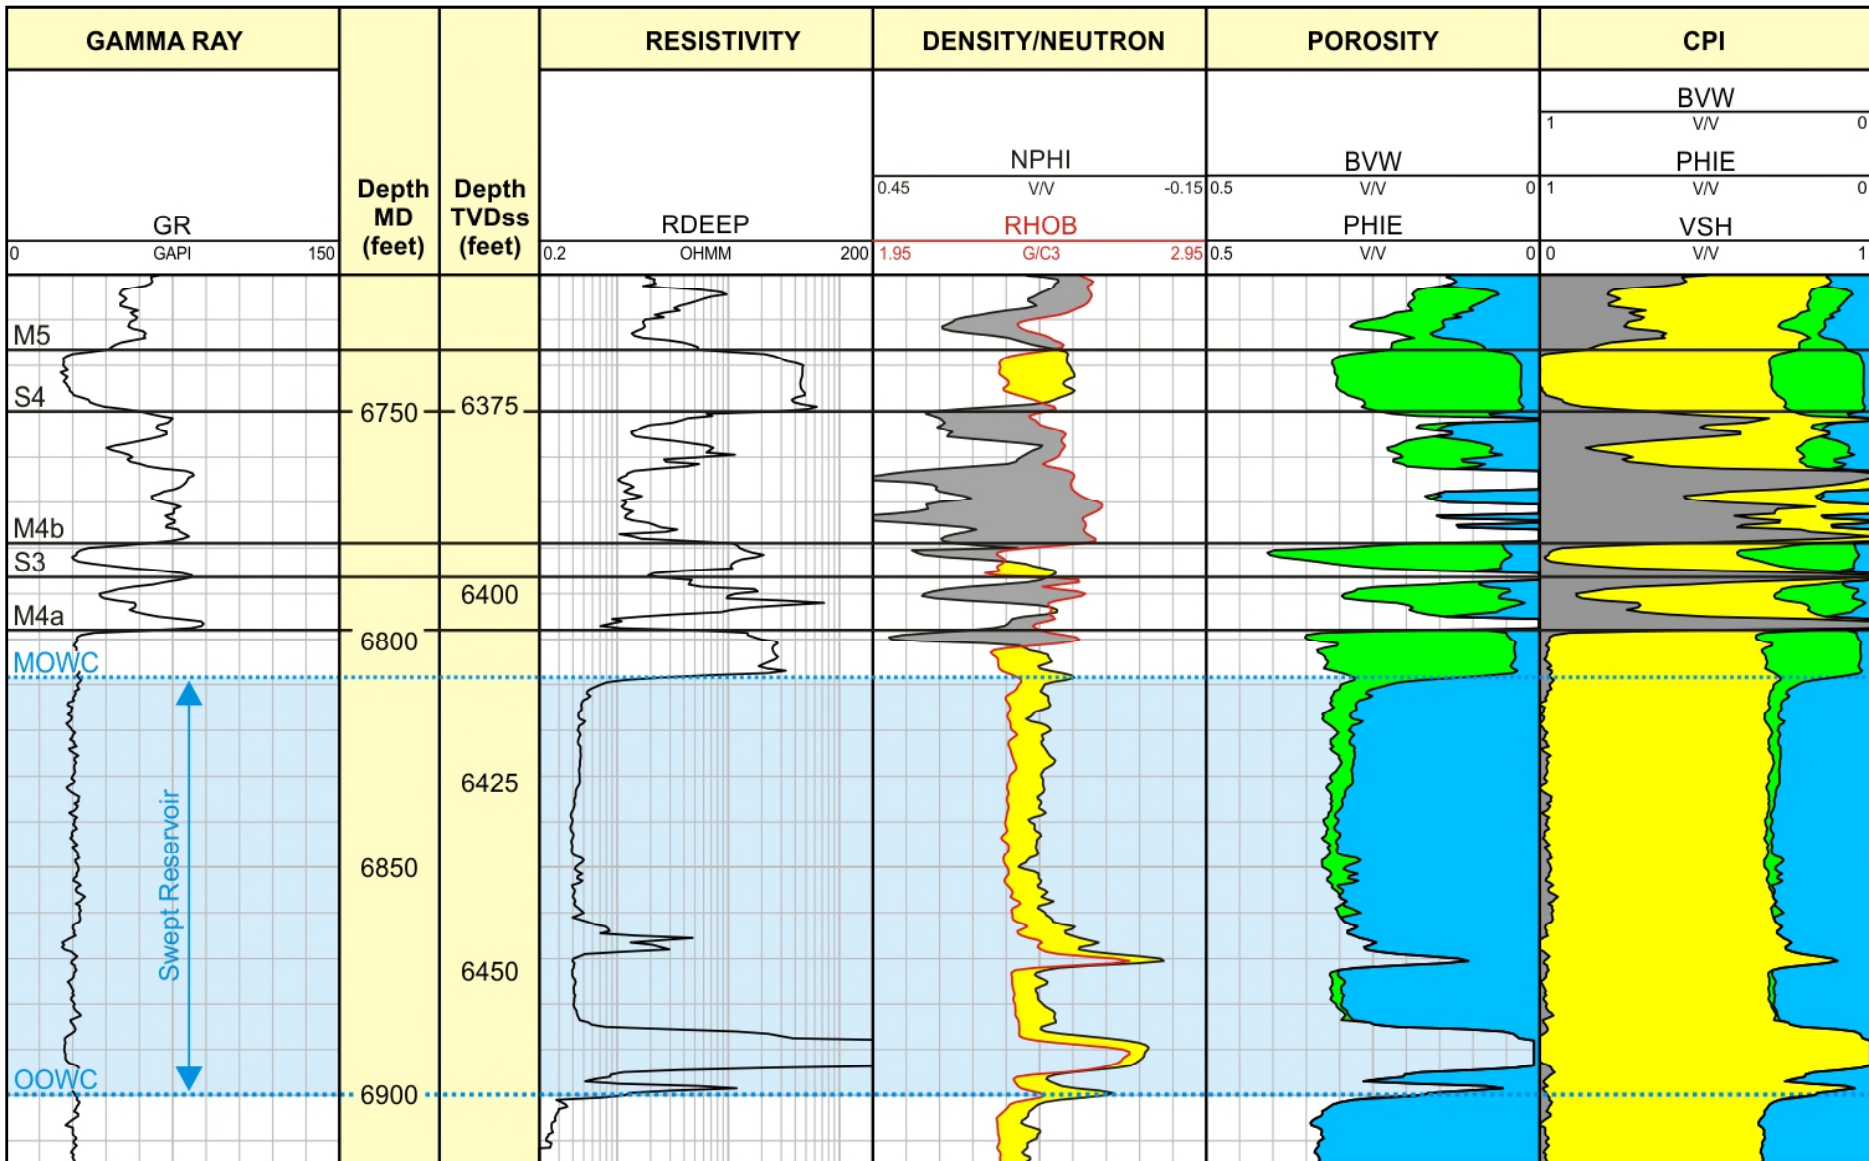

**Supplementary material 6.** Wireline log character in well 15/20a-18 across the Lower Balmoral Sandstone Unit. This well was drilled following several years of production from the Donan Field redevelopment. In the interval interpreted to be swept,  $S_w$  is considerably higher than calculated in the elevated  $S_w$  intervals. Additionally, the character of the logs is inconsistent with those recorded in the elevated  $S_w$  intervals (after [Ings et al. 2015](#)).
